# Supplementary material for: Tritium Labeling and Phase Distribution of 18-Crown-6 and Its Derivatives for Further Reprocessing of Radium Waste
Source: MDPI journal article supplement (doi:10.3390/en15196867), 2022-09-20
Supplement: s1 [file s1]

Supplementary Materials:

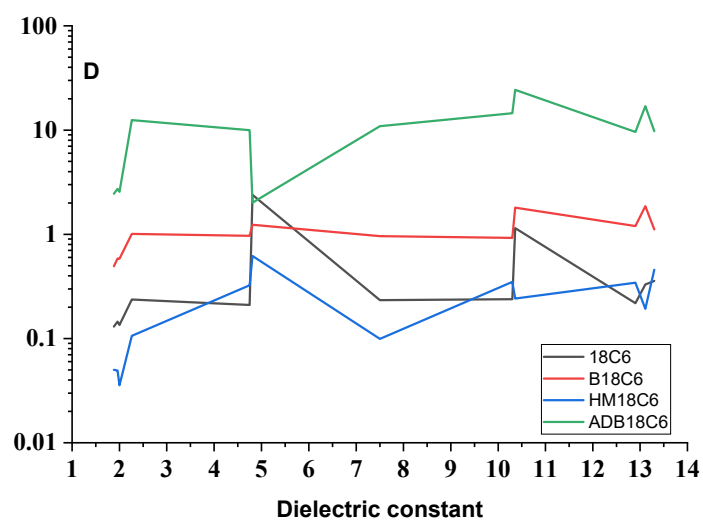

**Figure S1.** Distribution coefficients of the studied CE's depending on the dielectric constants of the organic phase molecules.

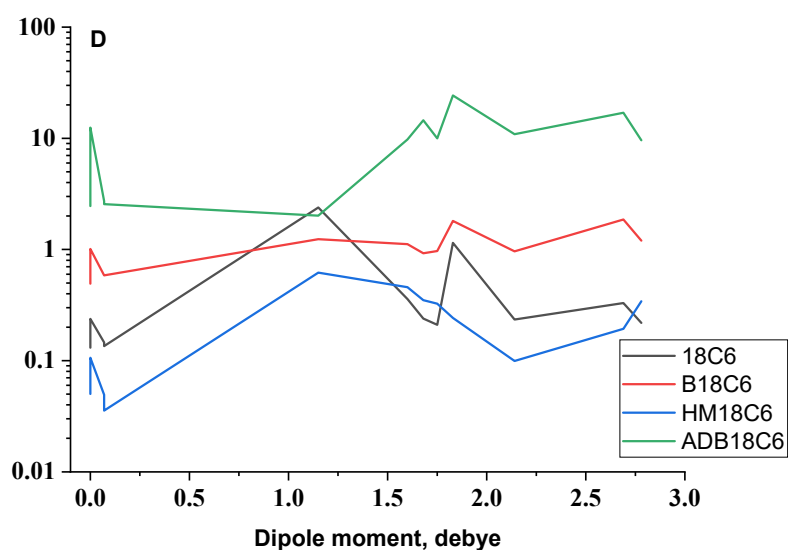

**Figure S2.** Distribution coefficients of the studied CE's depending on the dipole moments of the organic phase molecules.
